# Supplementary material for: The effect of surface-capping oleic acid on the optical properties of lanthanide-doped nanocrystals
Source: Royal Society of Chemistry journal article supplement (doi:10.1039/d0nr08488c), 2021-01-01
Supplement: d0nr08488c1.pdf [file d0nr08488c1.pdf]

## Supporting Information

### **The Effect of Surface-Capping Oleic Acid on the Optical Properties of Lanthanide-Doped Nanocrystals**

Renfu Li,<sup>b,#</sup> Xiaodie Fang,<sup>a,#</sup> Jilou Ren,<sup>a,#</sup> Baojun Chen,<sup>a,#</sup> Xiaoyun Yuan,<sup>a</sup> Xuechun Pan,<sup>a</sup> Peng Zhang,<sup>b</sup> Lantian Zhang,<sup>a</sup> Datao Tu,<sup>b</sup> Zhenlan Fang,<sup>a,b</sup> Xueyuan Chen,<sup>b,\*</sup> Qiang Ju<sup>a,b,\*</sup>

- a. Key Laboratory of Flexible Electronics (KLOFE) & Institute of Advanced Materials (IAM), Jiangsu National Synergetic Innovation Center for Advanced Materials (SICAM), Nanjing Tech University (NanjingTech), 30 South Puzhu Road, Nanjing 211816, P.R. China. Email: [iamqju@njtech.edu.cn](mailto:iamqju@njtech.edu.cn)
  - b. State Key Laboratory of Structural Chemistry, CAS Key Laboratory of Design and Assembly of Functional Nanostructures, Fujian Key Laboratory of Nanomaterials, Fujian Key Laboratory of Nanomaterials, Fujian Institute of Research on the Structure of Matter, Chinese Academy of Sciences, Fuzhou, Fujian 350002, PR China. Email: [xchen@fjirsm.ac.cn](mailto:xchen@fjirsm.ac.cn)
  - c. Fujian Science & Technology Innovation Laboratory for Optoelectronic Information of China, Fuzhou, Fujian 350108, China
- # These authors contribute equally to this work.

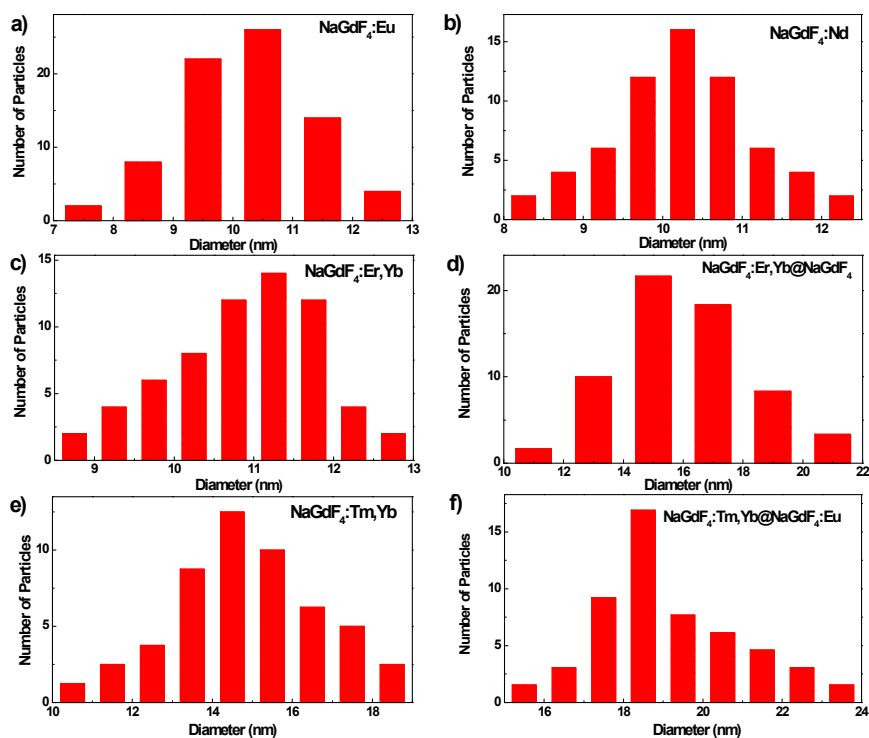

**Figure S1.** Particle size distribution of OA-capped a)  $\text{NaGdF}_4:\text{Eu}$ , b)  $\text{NaGdF}_4:\text{Nd}$ , c)  $\text{NaGdF}_4:\text{Er, Yb}$ , d)  $\text{NaGdF}_4:\text{Er, Yb}@NaGdF_4$ , e)  $\text{NaGdF}_4:\text{Tm, Yb}$ , and f)  $\text{NaGdF}_4:\text{Tm, Yb}@NaGdF_4:\text{Eu}$  nanocrystals obtained from the TEM images

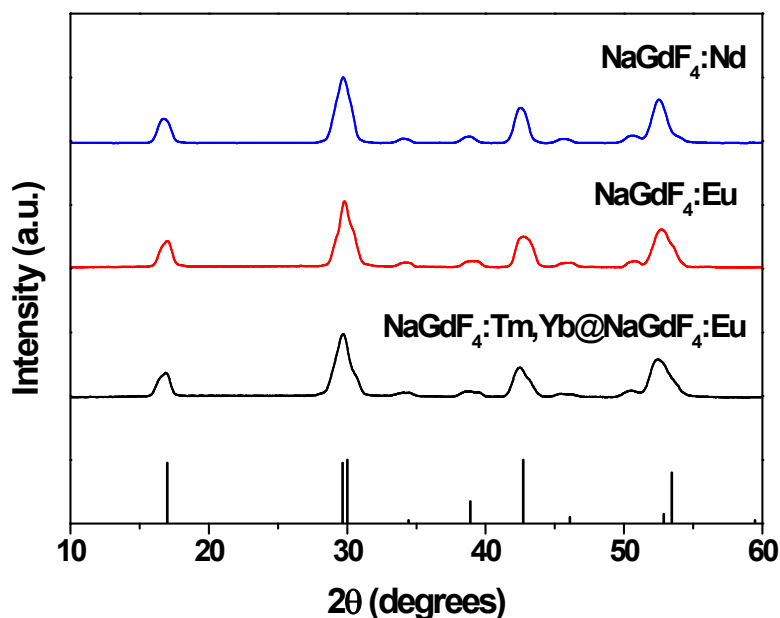

**Figure S2.** XRD patterns of  $\text{NaGdF}_4:\text{Tm, Yb}@NaGdF_4:\text{Eu}$ ,  $\text{NaGdF}_4:\text{Eu}$ , and  $\text{NaGdF}_4:\text{Nd}$  nanocrystals, and the corresponding line pattern of hexagonal phase  $\text{NaGdF}_4$  (JCPDS standard card no. 27-0699).

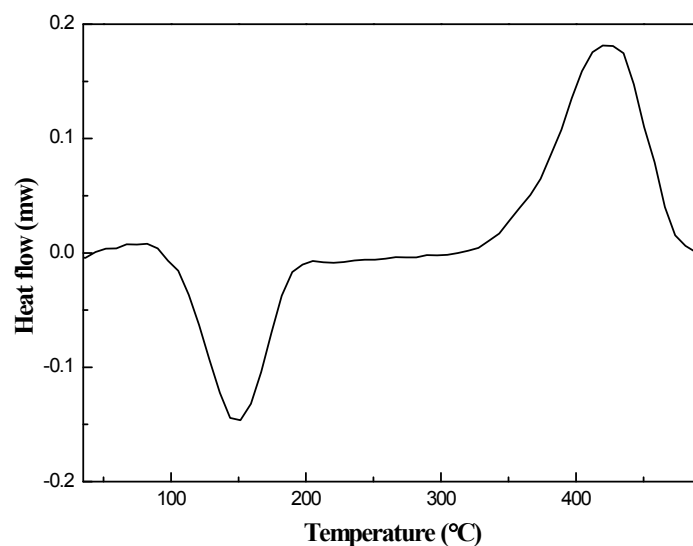

**Figure S3.** Differential Thermal Analysis OA-capped NaGdF<sub>4</sub>: Eu nanocrystals. The result indicates that the OA starts to leave the nanocrystals at 330 °C.

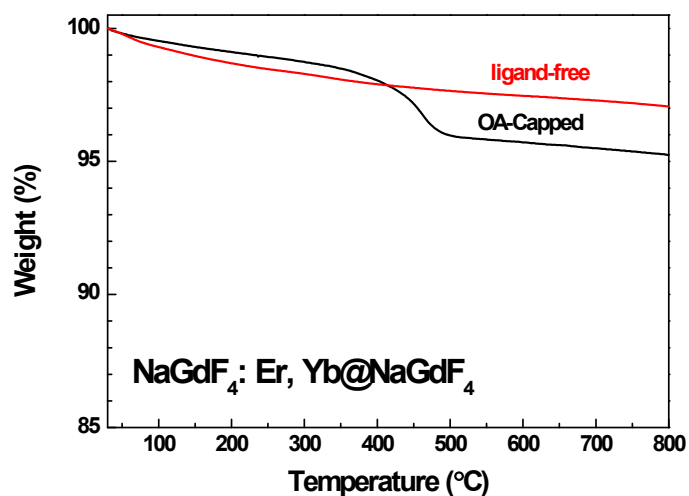

**Figure S4.** Thermal gravity analysis (TGA) of OA-capped (black) and ligand-free (red) NaGdF<sub>4</sub>: Er, Yb@NaGdF<sub>4</sub> core-shell nanocrystals. The weight losses for OA-capped and ligand-free samples are calculated to be 5.5% and 2.1%, respectively.

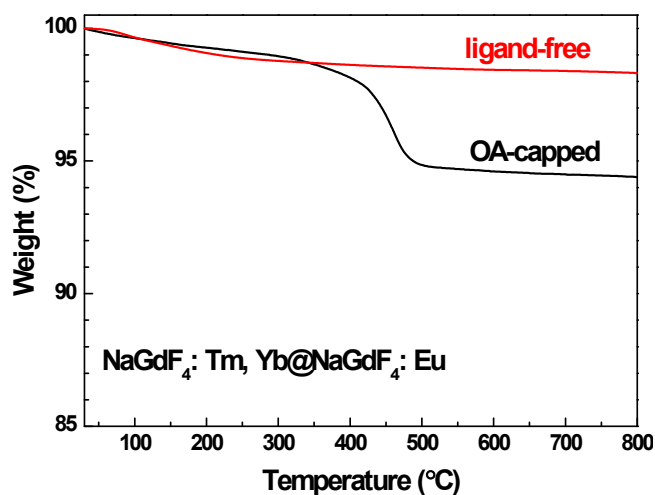

**Figure S5.** Thermal gravity analysis (TGA) of OA-capped (black) and ligand-free (red) NaGdF<sub>4</sub>: Tm, Yb@NaGdF<sub>4</sub>: Eu core-shell nanocrystals. The weight losses for OA-capped and ligand-free samples are calculated to be 5.3% and 1.5%, respectively.

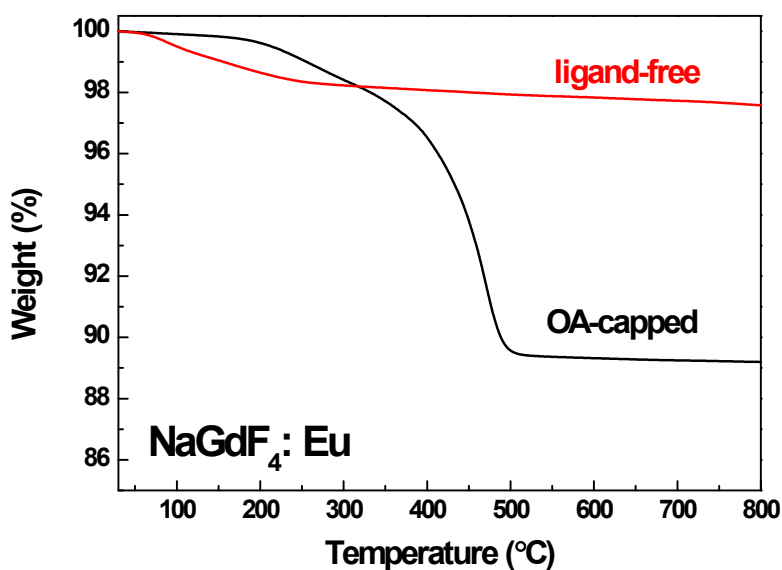

**Figure S6.** Thermal gravity analysis (TGA) of OA-capped (black) and ligand-free (red) NaGdF<sub>4</sub>: Eu nanocrystals. The weight losses for OA-capped and ligand-free samples are calculated to be 11.2% and 2.2%, respectively.

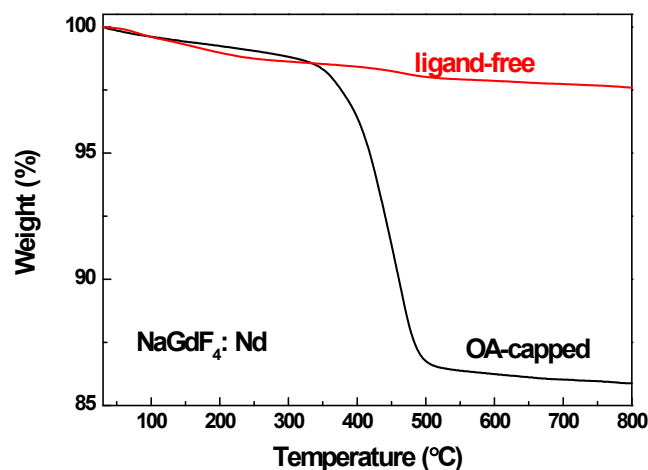

**Figure S7.** Thermal gravity analysis (TGA) of OA-capped (black) and ligand-free (red)  $\text{NaGdF}_4:\text{Nd}$  nanocrystals. The weight losses for OA-capped and ligand-free samples are calculated to be 13.5% and 3.0%, respectively.

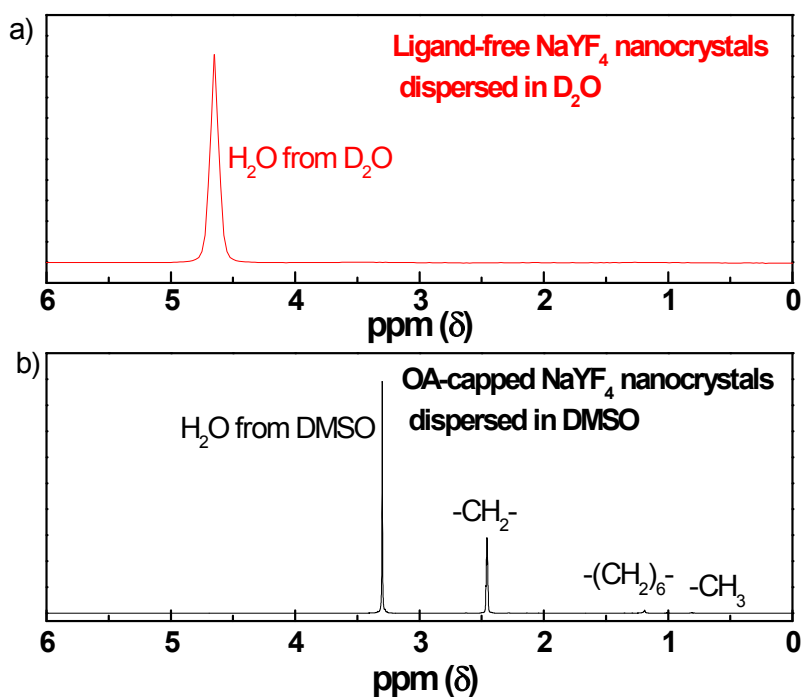

**Figure S8.** The  $^1\text{H}$  NMR spectrum of a) ligand-free  $\text{NaYF}_4$  nanocrystals dispersed in  $\text{D}_2\text{O}$  and b) OA-capped  $\text{NaYF}_4$  nanocrystals dispersed in DMSO were recorded on a JEOL JNM-ECZ400S spectrometer. Chemical shifts are reported in parts-per-million ( $\delta$ , ppm): a) 4.64 ( $\text{H}_2\text{O}$  from  $\text{D}_2\text{O}$ ) and b) 3.30 ( $\text{H}_2\text{O}$  from DMSO), 2.0-2.5 ( $-\text{CH}_2-$ ), 1.0-1.4 ( $-(\text{CH}_2)_6-$ ) and 0.5-1.0 ( $-\text{CH}_3$ ).

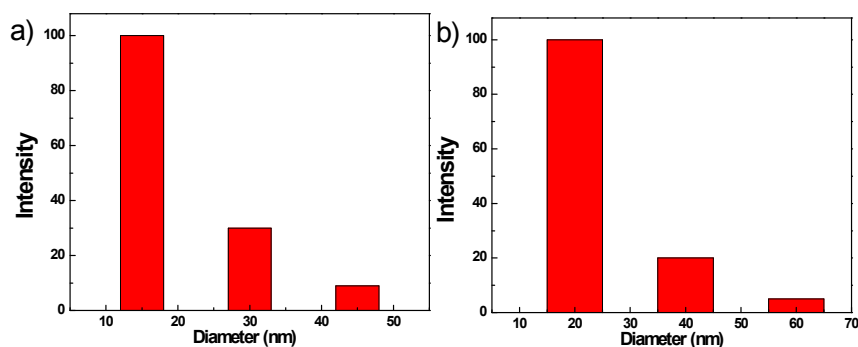

**Figure S9.** Hydrodynamic diameter distribution of a) ligand-free and b) OA-capped nanocrystals obtained from dynamic light scattering (DLS).

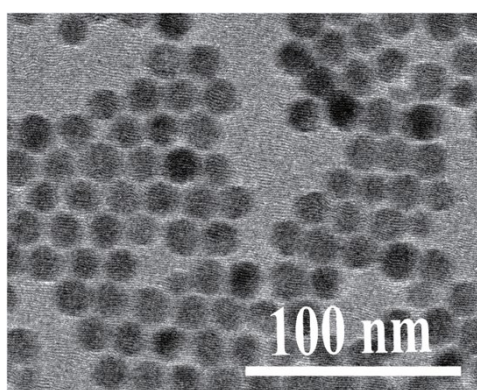

**Figure S10.** TEM image of ligand-free NaGdF<sub>4</sub>: Eu, illustrating that ligand-free nanocrystals are still monodispersed after removing OA ligand.

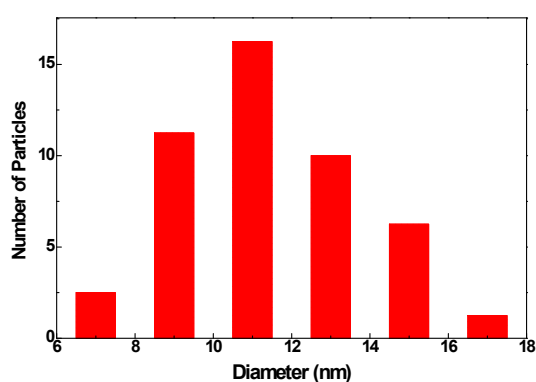

**Figure S11.** Particle size distribution of ligand-free NaGdF<sub>4</sub>: Eu nanocrystals obtained from the TEM images

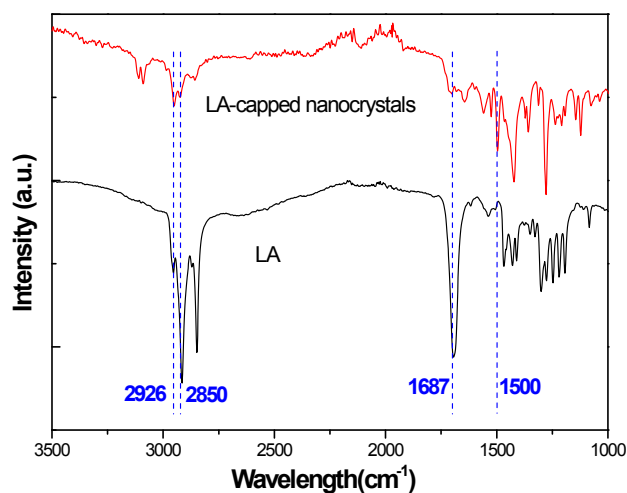

**Figure S12.** FTIR spectra of lauric acid (LA, black line) and LA-capped NaGdF<sub>4</sub>: Eu (red line). The absorption bands peaked at 2926 and 2850 cm<sup>-1</sup> can be assigned to the stretching vibration of -CH<sub>2</sub>-, and the bands peaked at 1687 and 1468 cm<sup>-1</sup> are attributed to stretching vibrations of COO in LA.

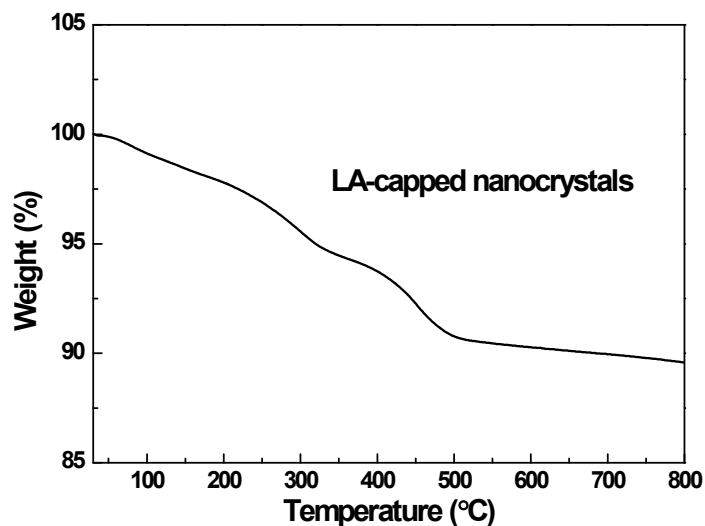

**Figure S13.** Thermal gravity analysis (TGA) of LA-capped NaGdF<sub>4</sub>: Er, Yb nanocrystals.

**Table 1.** The fitting parameters for the lifetime of emissive lanthanides in this work with the fitting equation to be  $y=a_1 \cdot \exp(-x/t_1)+y_0$ .

| <b>Samples in solid state</b>        |                      |                      |                           |                       |
|--------------------------------------|----------------------|----------------------|---------------------------|-----------------------|
|                                      | <b>a<sub>1</sub></b> | <b>y<sub>0</sub></b> | <b>t<sub>1</sub> (ms)</b> | <b>Standard error</b> |
| Er in OA-capped core                 | 4258.1               | 0                    | 0.161                     | 0.000275              |
| Er in ligand-free core               | 3998.4               | 0                    | 0.170                     | 0.00031               |
| Er in OA-capped core-shell           | 3651.3               | 0                    | 0.189                     | 0.00044               |
| Er in ligand-free core-shell         | 3497.8               | 0                    | 0.196                     | 0.00048               |
| Tm in OA-capped                      | 3296.6               | 0                    | 0.46                      | 0.00074               |
| Tm in ligand-free                    | 3941.7               | 0                    | 0.47                      | 0.00096               |
| Eu in OA-capped upconversion         | 1144.0               | 0                    | 3.96                      | 0.00479               |
| Eu in ligand-free upconversion       | 1056.1               | 0                    | 4.02                      | 0.0059                |
| Eu in OA-capped downshifting         | 1204.1               | 0                    | 6.04                      | 0.0090                |
| Eu in ligand-free downshifting       | 1301.6               | 0                    | 6.22                      | 0.014                 |
| Nd in OA-capped                      | 3962.9               | 0                    | 0.20                      | 0.00054               |
| Nd in ligand-free                    | 3593.2               | 0                    | 0.22                      | 0.00074               |
| <b>Samples in colloidal solution</b> |                      |                      |                           |                       |
|                                      | <b>a<sub>1</sub></b> | <b>y<sub>0</sub></b> | <b>t<sub>1</sub></b>      | <b>Standard error</b> |
| Er in OA-capped core                 | 4258.1               | 0                    | 0.051                     | 0.000085              |
| Er in ligand-free core               | 16574.0              | 0                    | 0.026                     | 0.000042              |
| Er in OA-capped core-shell           | 2089.3               | 0                    | 0.105                     | 0.00018               |
| Er in ligand-free core-shell         | 2198.7               | 0                    | 0.094                     | 0.00016               |
| Tm in OA-capped                      | 7154.3               | 0                    | 0.26                      | 0.00042               |
| Tm in ligand-free                    | 8630.1               | 0                    | 0.21                      | 0.00029               |
| Eu in OA-capped upconversion         | 1147.6               | 0                    | 2.90                      | 0.0087                |
| Eu in ligand-free upconversion       | 1219.7               | 0                    | 2.72                      | 0.0078                |
| Eu in OA-capped downshifting         | 865.3                | 0                    | 3.49                      | 0.021                 |
| Eu in ligand-free downshifting       | 1099.5               | 0                    | 3.78                      | 0.010                 |
| Nd in OA-capped                      | 1649.5               | 0                    | 0.12                      | 0.0008                |
| Nd in ligand-free                    | 1350.0               | 0                    | 0.08                      | 0.00065               |



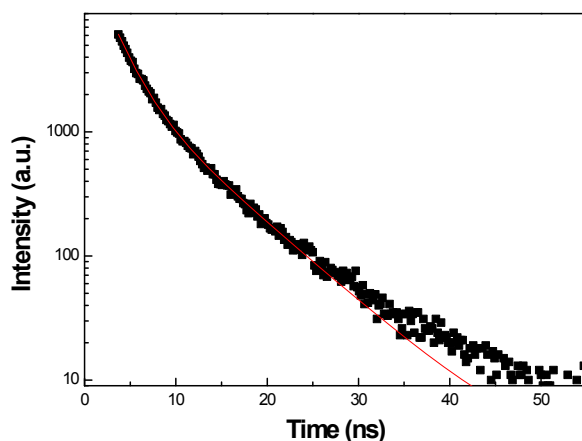

**Figure S14.** Luminescence decays of emission band peaked at 490 nm of NaGdF<sub>4</sub>: 5 mol% Eu nanocrystals. The decay curve fits to a dual-exponential function, and the average lifetime is calculated to be 2.52 ns, indicating that this emission band could not be attributed to the emission of Eu<sup>3+</sup>.

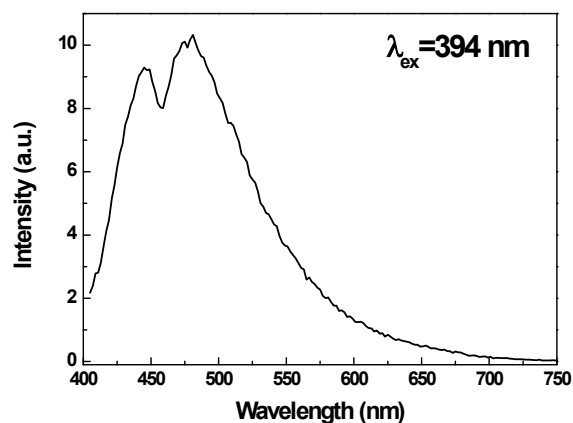

**Figure S15.** The downshifting spectra of left OA after acid treatment of OA-capped nanocrystals. The presence of broad emission band unambiguously confirm that the broad band in OA-capped NaGdF<sub>4</sub>: 5 mol% Eu belong to the emission of surface-capped OA.

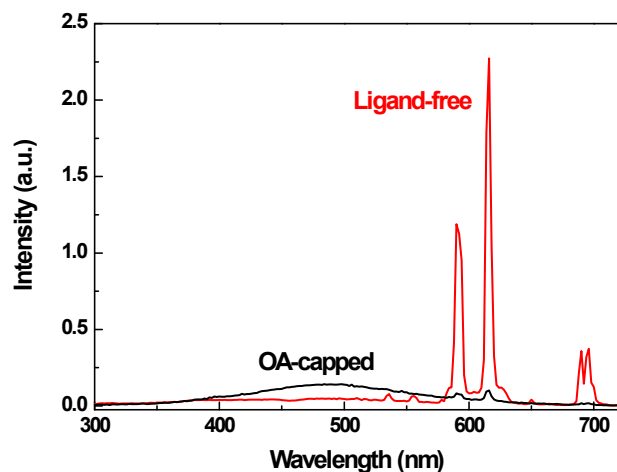

**Figure S16.** The downshifting spectra of OA-capped (black) and ligand-free (red) NaGdF<sub>4</sub>: 5 mol% Eu nanocrystals in solid states under the excitation of 272 nm. In contrast to the excitation at 394 nm, more enhancement in emission intensity of Eu<sup>3+</sup> between OA-capped and ligand-free samples excited at 272 nm, which should be attributed to the increased screening effect of OA from 394 nm to 272 nm.

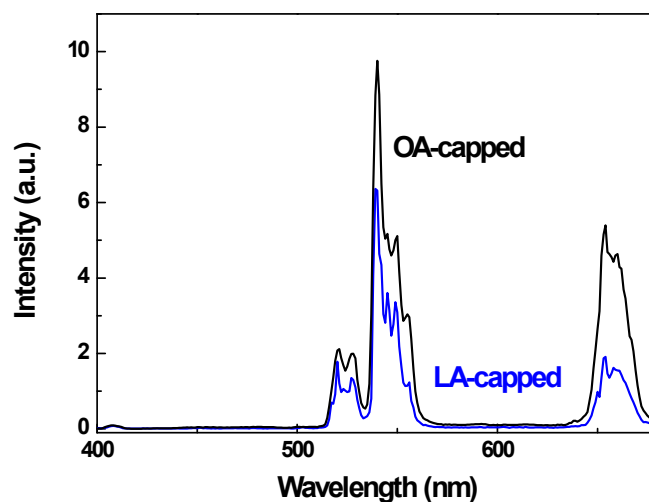

**Figure S17.** The emission spectra of OA-capped (black) and LA-capped (blue) NaGdF<sub>4</sub>: 2 mol%Er, 18 mol% Yb nanocrystals in PDMS colloidal solutions. The emission intensity of LA-capped nanocrystals in solutions can only arrive 0.68 time as strong as that of OA-capped nanocrystals, which is stronger than that of ligand-free samples due to the presence of short-chain LA.

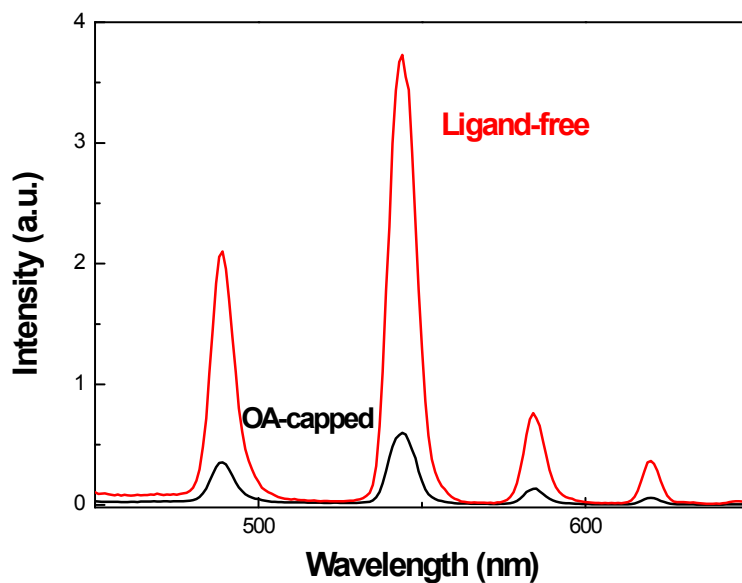

**Figure S18.** The emission spectra of NaGdF<sub>4</sub>: 5 mol% Tb, 15 mol% Ce nanocrystals with OA-capped surface (black line) or ligand-free surface (red line) in PDMS solution. The excitation is 254 nm, and the concentrations for OA-capped and ligand-free nanocrystals in PDMS are 21.9 mg/mL and 20.0 mg/mL, respectively.

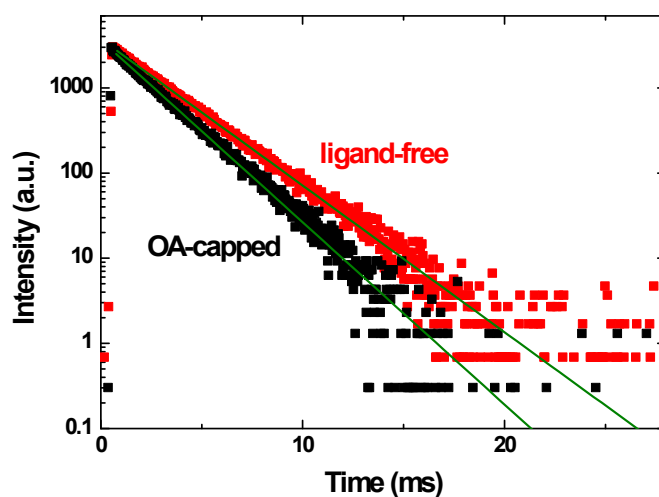

**Figure S19.** Time-dependent photoluminescence measurement of  ${}^5D_4 \rightarrow {}^7F_5$  transition of Tb<sup>3+</sup> for NaGdF<sub>4</sub>: 5 mol% Tb, 15 mol% Ce nanocrystals with OA-capped (black) or ligand-free (red) surface. The lifetimes for OA-capped and ligand-free nanocrystals are calculated to be 2.02 and 2.52 ms, respectively.

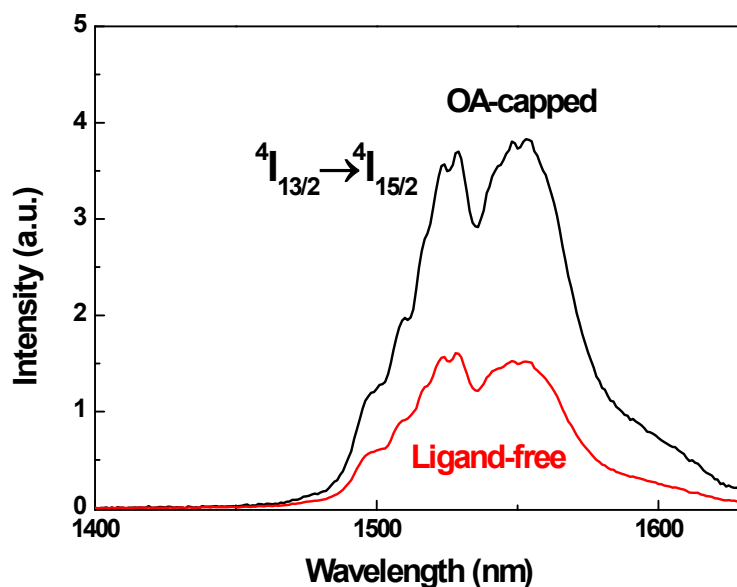

**Figure S20.** The emission spectra of NaGdF<sub>4</sub>: 2 mol% Er, 20 mol% Yb nanocrystals with the surface being OA-capped (black line) or ligand-free (red line). The concentrations for OA-capped and ligand-free nanocrystals in PDMS are 23.3 and 20.0 mg/mL, respectively.

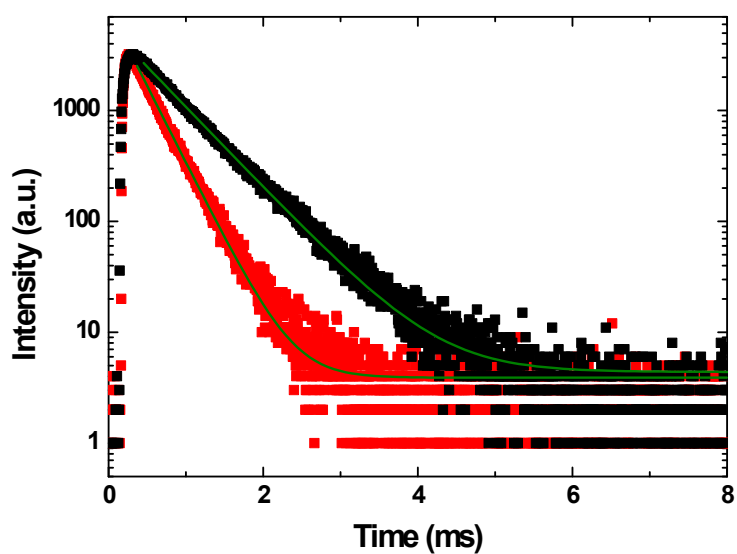

**Figure S21.** Time-dependent photoluminescence measurement of  ${}^4I_{13/2} \rightarrow {}^4I_{15/2}$  transition of NaGdF<sub>4</sub>: 2 mol% Er, 20 mol% Yb nanocrystals with OA-capped (black) or ligand-free (red) surface. The lifetimes for OA-capped and ligand-free nanocrystals are calculated to be 0.60 and 0.35 ms, respectively.
